# Supplementary material for: Characterization of Drosophila GDNF Receptor-Like and Evidence for Its Evolutionarily Conserved Interaction with Neural Cell Adhesion Molecule (NCAM)/FasII
Source: PubMed Central journal article supplement (PMC3527400; doi:10.1371/journal.pone.0051997), 2012-12-20
Supplement: pone.0051997.s001.pdf [file pone.0051997.s001.pdf]

**A**

|           | 1   | 2        | 3      | 4           | 5         | 6         | 7                 | 8                 | 9           | 10               |               |               |      |
|-----------|-----|----------|--------|-------------|-----------|-----------|-------------------|-------------------|-------------|------------------|---------------|---------------|------|
| DmGfr1 D0 | ILN | CILARQL  | CFEDPS | CSAILEII    | PRVCG     | PIPVSC    | STV-TVTK          | CQAALRTLQAFQFFRPT | CLCK        | -EPGMDDP         | -----         | CNHFRDFLFDHPC | CGFV |
| DmGfr1 D1 | LPT | CNHALSVC | QQERK  | CLKLFEDFKTH | CKVRD-NK  | CKMENRDAC | --HDSWTNLRLSPM    | FGCI              | CPNNHMKKR   | -----            | CDRIFNIVNHNPC | CVVR          |      |
| DmGfr1 D2 | QST | CHTALDT  | CREDPS | CSSSLQ      | PMLTH     | CELHRC    | NRNACMSSSLQAFYKGP | HEDLNLDIAF        | -CLCK       | KTSSQQNGNGNRHDMC | -MIAQEKLHPV   | CAQR          |      |
| DmGfr1 D3 | PPA | CHVVADS  | CKEDRE | CRLKLEYEQ   | CAVDSVTKK | CAGRPSGC  | -RTAMIGILGTMLR    | TTCA              | CQGTDPQHLYQ | -----            | CVGWRRLWLNPC  | CVVE          |      |

**B**

|                              | 1 | 2       | 3      | 4           | 5         | 6      | 7         | 8                   | 9         | 10     |             |        |    |               |
|------------------------------|---|---------|--------|-------------|-----------|--------|-----------|---------------------|-----------|--------|-------------|--------|----|---------------|
| <i>Dmel Gfr-like</i> D1      | C | NHAL-SV | CQQERK | CLKLFEDFKTH | CKVR---   | DNKC-- | KMENRDACH | HDSWTNLRLSPM        | -----     | FGCI   | CPNN--      | HMKK-- | RC | DRIFNIVNHNPC  |
| <i>Dvir Gfr1-like</i>        | C | NHAL-SV | CQQERK | CLKLFEDFKTH | CKVR---   | DNKC-- | KMENRDACH | DAWTNLRLSPM         | -----     | FGCI   | CPNN--      | HMKK-- | RC | DRIFNIVNHNPC  |
| <i>Apis mellifera</i> pp     | C | NHAL-SV | CLRGKP | CSQIYEDFKSN | CKAR---   | EGKC-- | RMENRSACH | HDSWTQLRLSPM        | -----     | FGCI   | CPNN--      | HMKR-- | RC | DRIFSTVNHNPC  |
| <i>C.elegans</i> pp          | C | DAALYQV | CLKHVS | CSQLWSMFRKN | CDVDL--   | DNQC-- | RMADREV   | CWQSFEGLTWSGL       | -----     | GDCQ   | CASSNSD     | ----   | CH | WIRLHTNYNKC   |
| <i>Ciona intestinalis</i> pp | C | LQSL-KN | CKRNST | CKEVYKSVKNC | CKAK---   | EAQC   | NARTADLQQ | CAMDIAYLREAAFPID    | -----     | NKCI   | CHGKSLSLKKL | LVRC   | SE | ILNTVYANPC    |
| <i>Gallus gallus Gfr1</i>    | C | TIAK-RV | CQEDLY | CSSVYRSFQRA | CRAE---   | AAKC-- | RMGSQE-   | CLSAWKELRKTVL       | -----     | GECKC- | SEPL-Q      | ---    | RR | CLRIWKGIFSNPC |
| <i>R.norwegicus Gfr1</i> D3  | C | LSQL-DS | CKTNYI | CRSRLADFF   | TNCQPESRS | SVSNC- | LKENY-AD  | CLLAYSGLIGTVXTPNYVD | SSSLSVAPW | CD     | CNSGNDLED   | ---    | CL | KFLNFFKDNTC   |
