# Supplementary material for: Characterization of Drosophila GDNF Receptor-Like and Evidence for Its Evolutionarily Conserved Interaction with Neural Cell Adhesion Molecule (NCAM)/FasII
Source: PubMed Central journal article supplement (PMC3527400; doi:10.1371/journal.pone.0051997), 2012-12-20

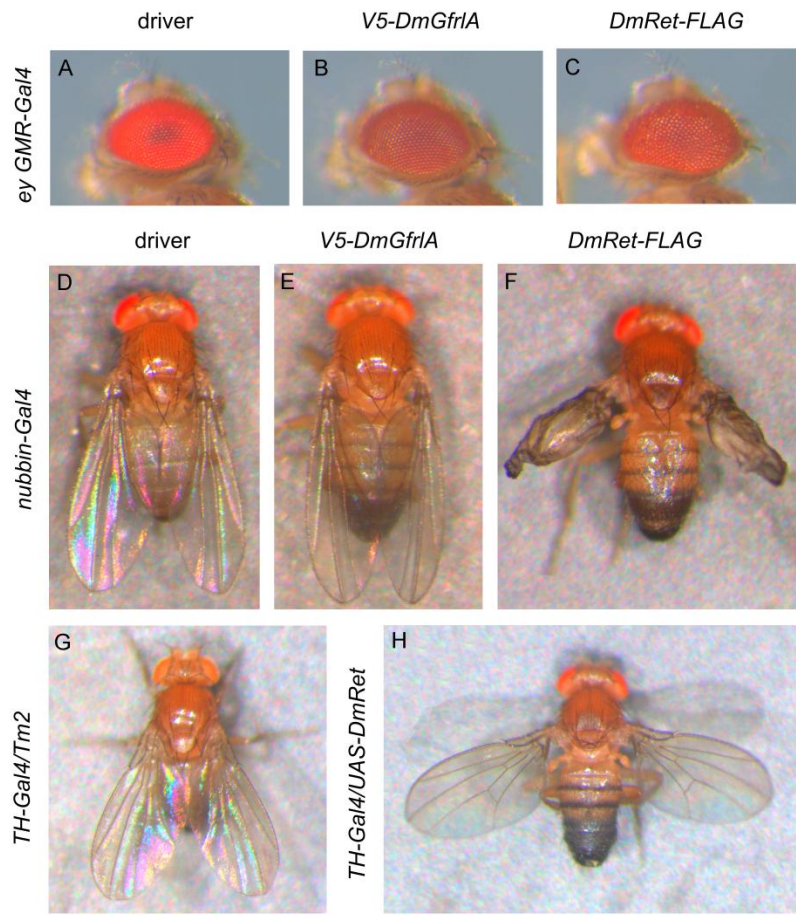

Supplement: pone.0051997.s004.pdf [file pone.0051997.s004.pdf]
