# Supplementary material for: Characterization of Drosophila GDNF Receptor-Like and Evidence for Its Evolutionarily Conserved Interaction with Neural Cell Adhesion Molecule (NCAM)/FasII
Source: PubMed Central journal article supplement (PMC3527400; doi:10.1371/journal.pone.0051997), 2012-12-20
Supplement: pone.0051997.s006.pdf [file pone.0051997.s006.pdf]

**Table S1. Genomic locations and features of *DmGfrl* exons on 3R:16310273-16204718.**

| exon | present in transcripts | coding (yes/no) | note                                                   | encodes (parts of)               | upper coordinate | lower coordinate | 5' end sequence       | 3' end sequence       |
|------|------------------------|-----------------|--------------------------------------------------------|----------------------------------|------------------|------------------|-----------------------|-----------------------|
| 1    | B, Bb, D               | no              |                                                        |                                  | 16310273         | 16309697         | GTTACAGCAACCAAAACGCG  | ATGCCACCGCTAGCCATGT   |
| 2    | B, Bb, D               | no              |                                                        |                                  | 16307352         | 16306415         | GTGAAGTGTGAGGCAAACAA  | ATGTCGCTGATTAATCCAA   |
| 3    | B, Bb, D               | yes             | Kozak/ATG                                              | signal sequence                  | 16290839         | 16290727         | ATTCAGCTGAACAGTAGAC   | ATCGGAATTTTTATTAGGT   |
| 4    | A, Ab                  | no              |                                                        |                                  | 16275412         | 16275166         | AACAGTTTTCGACTGAGACTC | AAGCTGTAATCATAAAGTG   |
| 5    | A, Ab                  | yes             | Kozak/ATG                                              | signal sequence                  | 16263856         | 16263401         | CAAGCGAAAGTATTGCAGTT  | TGGCCATCGGACGATCGGGT  |
| 6    | A, Ab, B, Bb, D        | yes             | stop for transcript D after skipping of 3' splice site | domain 0                         | 16236927         | 16236804         | GGTTCCACCATTAAGGGCGT  | CGTCTGCGGACCCATTCCAG  |
| 7    | A, Ab, B, Bb, D        | yes             |                                                        | domain 0                         | 16229125         | 16228946         | CATTGTCAGTGCCTGCAGC   | CGGATTTGTGCTGAAGAAAG  |
| 8    | A, Ab, B, Bb, D        | yes             |                                                        | domain 1                         | 16228884         | 16228734         | AGCCGAAAAGGATCCGTAC   | AATGCAAAATGGAACAGG    |
| 9    | A, Ab, B, Bb, D        | yes             |                                                        | domain 1                         | 16227031         | 16226896         | CAGGGACGCCTGCCACGACT  | CACAATCCTTGGTGGTAAG   |
| 10   | C                      | no              |                                                        |                                  | 16225502         | 16225080         | GGAGGACGAGGCAATGAG    | GGGTCCCACCCACGATTCC   |
| 11   | C                      | yes             | Kozak/ATG?                                             |                                  | 16224349         | 16224246         | CACTGGCACCAAAATGCACA  | CTCCATGGACGAACGAGGTG  |
| 12   | Ab, Bb                 | yes             |                                                        | N-glyc site                      | 16219722         | 16219387         | GTAAGAATATTGGGCATGGA  | GCCGGTGTACTACCAAAGT   |
| 13   | A, Ab, B, Bb, C        | yes             |                                                        |                                  | 16216535         | 16216480         | GTGGTCAGGATGTCGAAGTT  | ATAATCAAGCAACACTTTCAG |
| 14   | A, Ab, B, Bb, C        | yes             |                                                        | domain 2                         | 16216155         | 16215968         | CAGAGTACCTGTCACACGGC  | ACATCGCCTTTGTCTATGCAA |
| 15   | A, Ab, B, Bb, C        | yes             |                                                        | domain 2/3, heparin binding site | 16215878         | 16215684         | AAAAACAAGCAGCCAGCAG   | AAGGAGGACCGGAGTGCAG   |
| 16   | A, Ab, B, Bb, C        | yes             |                                                        | domain 3                         | 16213349         | 16213141         | CAGATTAAGTTGGAGTATT   | TGTGGATGAACCCCTGTGTGG |
| 17   | A, Ab, B, Bb, C        | yes             |                                                        | O-glyc sites                     | 16213005         | 16212780         | GTTGAGGCTCAAAGGACTT   | TCTCAAGGACGTAATAACGG  |
| 18   | A, Ab, B, Bb, C        | yes             |                                                        | O-glyc sites                     | 16211701         | 16211373         | GCAAAAGAGAAATCGGAGC   | ACAACAACACAGCCGCAAG   |
| 19   | A, Ab, B, Bb, C        | yes             |                                                        |                                  | 16209590         | 16209526         | GAAACTGCGTTGTCCAGCGA  | GGGAAGGCAGCAGCAAGCGA  |
| 20   | A, Ab, B, Bb, C        | yes             |                                                        |                                  | 16209055         | 16208830         | ATCTACTCCTTGACGACGT   | GGGAGTACATTCTGCCAGGTG |
| 21   | A, Ab, B, Bb, C        | yes             |                                                        | N-glyc site                      | 16208014         | 16207890         | GGATATTCCTGCTCGGA     | ACCACATACATCGATAATCAG |
| 22   | A, Ab, B, Bb, C        | yes             |                                                        | N-glyc site                      | 16207794         | 16207686         | ACGCACTGCACCCCTCACGCT | TTGAGCTGCTGCGTAAGGAGA |
| 23   | A, Ab, B, Bb, C        | yes             | includes stop codon and 3'UTR                          | GPI anchoring site               | 16207298         | 16204718         | AGGACGAGTGCACCCGAT    | CGTTAAAGTAAACTGATAAAT |
